# Supplementary material
Source: MDPI journal article supplement (https://www.mdpi.com/2410-3888/8/3/154)

Supplementary section

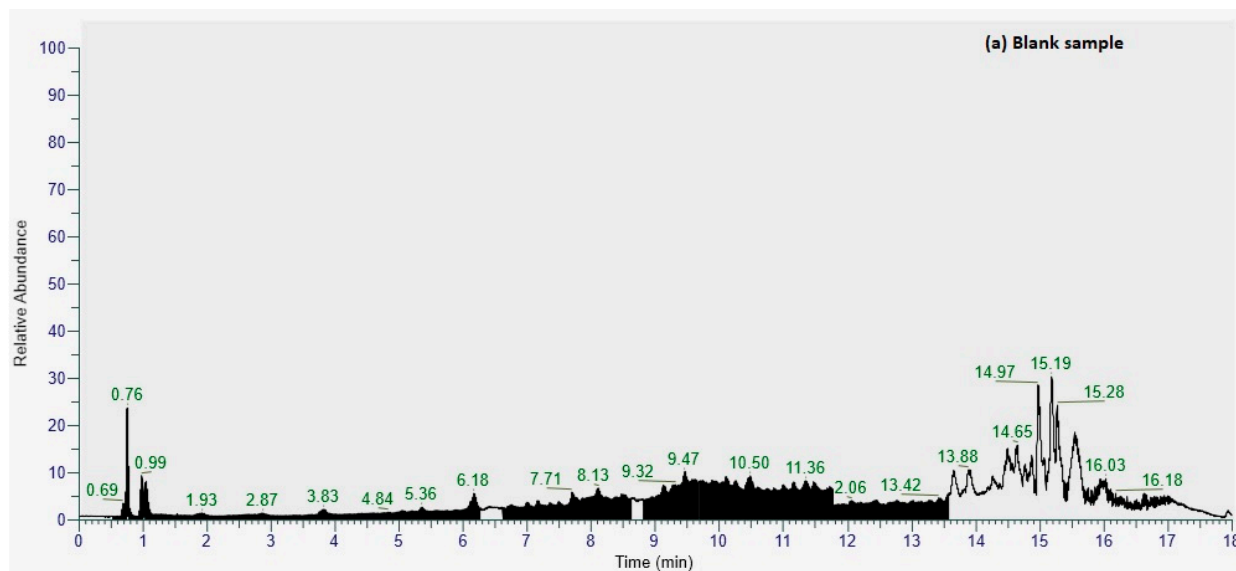

Figure S1 : Blank sample chromatography

Supplement: s1 [file s1]
